# Supplementary material
Source: publisher site journal article supplement (https://www.dovepress.com/article/218322)

**Table S1. Association between socioeconomic status and individual performance measures of guideline-recommended care**

|                                                                                                                            |                    |
|----------------------------------------------------------------------------------------------------------------------------|--------------------|
| Ischemic stroke patient without atrial fibrillation receives platelet inhibitor therapy within the second day of admission |                    |
| Family income tertile                                                                                                      |                    |
| Low                                                                                                                        | 0.88 (0.81 - 0.96) |
| Middle                                                                                                                     | 0.93 (0.87 - 0.98) |
| High                                                                                                                       | Reference          |
| Employment status                                                                                                          |                    |
| Working                                                                                                                    | Reference          |
| Retired                                                                                                                    | 0.92 (0.82 - 1.03) |
| Unemployed                                                                                                                 | 0.97 (0.84 - 1.13) |
| Highest achieved education                                                                                                 |                    |
| Primary                                                                                                                    | 0.92 (0.83 - 1.02) |
| Upper secondary                                                                                                            | 0.99 (0.90 - 1.09) |
| Higher                                                                                                                     | Reference          |
| Reference person                                                                                                           | 3.03 (2.26 - 4.04) |
| R <sup>2</sup>                                                                                                             | 0.037              |
| n                                                                                                                          | 53,567             |

\* Odds ratios (95% confidence interval) of individual performance measure fulfilment. Adjusted for gender, age, previous stroke, diabetes mellitus, hypertension, stroke severity and year. Multilevel modelling was used as the patient-level was nested in the hospital department-level.

**Table S2. Association between socioeconomic status and individual performance measures of guideline-recommended care**

|                                                                                                                       |                    |
|-----------------------------------------------------------------------------------------------------------------------|--------------------|
| Ischemic stroke patient with atrial fibrillation receives oral anticoagulation therapy within 14 days after admission |                    |
| Family income tertile                                                                                                 |                    |
| Low                                                                                                                   | 0.74 (0.61 - 0.89) |
| Middle                                                                                                                | 0.75 (0.61 - 0.94) |
| High                                                                                                                  | Reference          |
| Employment status                                                                                                     |                    |
| Working                                                                                                               | Reference          |
| Retired                                                                                                               | 1.06 (0.85 - 1.33) |
| Unemployed                                                                                                            | 1.16 (0.51 - 2.63) |
| Highest achieved education                                                                                            |                    |
| Primary                                                                                                               | 0.86 (0.70 - 1.07) |
| Upper secondary                                                                                                       | 0.82 (0.65 - 1.03) |
| Higher                                                                                                                | Reference          |
| Reference person                                                                                                      | 0.68 (0.38 - 1.20) |
| R <sup>2</sup>                                                                                                        | 0.102              |
| n                                                                                                                     | 6,207              |

\* Odds ratios (95% confidence interval) of individual performance measure fulfilment. Adjusted for gender, age, previous stroke, diabetes mellitus, hypertension, stroke severity and year. Multilevel modelling was used as the patient-level was nested in the hospital department-level.

**Table S3. Association between socioeconomic status and individual performance measures of guideline-recommended care**

|                                                                    |                    |
|--------------------------------------------------------------------|--------------------|
| Stroke patient is examined with CT/MR-scan on the day of admission |                    |
| Family income tertile                                              |                    |
| Low                                                                | 0.82 (0.75 - 0.91) |
| Middle                                                             | 0.91 (0.85 - 0.97) |
| High                                                               | Reference          |
| Employment status                                                  |                    |
| Working                                                            | Reference          |
| Retired                                                            | 0.86 (0.81 - 0.91) |
| Unemployed                                                         | 0.89 (0.80 - 1.00) |
| Highest achieved education                                         |                    |
| Primary                                                            | 0.96 (0.88 - 1.04) |
| Upper secondary                                                    | 0.98 (0.90 - 1.06) |
| Higher                                                             | Reference          |
| Reference person                                                   | 3.22 (2.54 - 4.09) |
| R <sup>2</sup>                                                     | 0.120              |
| n                                                                  | 73,724             |

\* Odds ratios (95% confidence interval) of individual performance measure fulfilment. Adjusted for gender, age, previous stroke, diabetes mellitus, hypertension, stroke severity and year. Multilevel modelling was used as the patient-level was nested in the hospital department-level.

**Table S4. Association between socioeconomic status and individual performance measures of guideline-recommended care**

|                                                                                                                                         |                    |
|-----------------------------------------------------------------------------------------------------------------------------------------|--------------------|
| Stroke patient is assessed by a physiotherapist regarding need of rehabilitation (including type and extent) within 2 days of admission |                    |
| Family income tertile                                                                                                                   |                    |
| Low                                                                                                                                     | 0.88 (0.83 - 0.94) |
| Middle                                                                                                                                  | 0.97 (0.92 - 1.02) |
| High                                                                                                                                    | Reference          |
| Employment status                                                                                                                       |                    |
| Working                                                                                                                                 | Reference          |
| Retired                                                                                                                                 | 0.99 (0.90 - 1.08) |
| Unemployed                                                                                                                              | 0.97 (0.85 - 1.11) |
| Highest achieved education                                                                                                              |                    |
| Primary                                                                                                                                 | 1.03 (0.94 - 1.14) |
| Upper secondary                                                                                                                         | 1.04 (0.97 - 1.11) |
| Higher                                                                                                                                  | Reference          |
| Reference person                                                                                                                        | 0.85 (0.62 - 1.16) |
| R <sup>2</sup>                                                                                                                          | 0.075              |
| n                                                                                                                                       | 60,472             |

\* Odds ratios (95% confidence interval) of individual performance measure fulfilment. Adjusted for gender, age, previous stroke, diabetes mellitus, hypertension, stroke severity and year. Multilevel modelling was used as the patient-level was nested in the hospital department-level.

**Table S5. Association between socioeconomic status and individual performance measures of guideline-recommended care**

|                                                                                                                                                         |                    |
|---------------------------------------------------------------------------------------------------------------------------------------------------------|--------------------|
| Stroke patient is assessed by an occupational therapist regarding need of rehabilitation (including type and extent) within the second day of admission |                    |
| Family income tertile                                                                                                                                   |                    |
| Low                                                                                                                                                     | 0.88 (0.82 - 0.94) |
| Middle                                                                                                                                                  | 0.97 (0.92 - 1.02) |
| High                                                                                                                                                    | Reference          |
| Employment status                                                                                                                                       |                    |
| Working                                                                                                                                                 | Reference          |
| Retired                                                                                                                                                 | 0.99 (0.92 - 1.06) |
| Unemployed                                                                                                                                              | 0.95 (0.84 - 1.07) |
| Highest achieved education                                                                                                                              |                    |
| Primary                                                                                                                                                 | 0.98 (0.90 - 1.08) |
| Upper secondary                                                                                                                                         | 1.01 (0.96 - 1.07) |
| Higher                                                                                                                                                  | Reference          |
| Reference person                                                                                                                                        | 0.76 (0.58 - 1.01) |
| R <sup>2</sup>                                                                                                                                          | 0.082              |
| n                                                                                                                                                       | 61,387             |

\* Odds ratios (95% confidence interval) of individual performance measure fulfilment. Adjusted for gender, age, previous stroke, diabetes mellitus, hypertension, stroke severity and year. Multilevel modelling was used as the patient-level was nested in the hospital department-level.

**Table S6. Association between socioeconomic status and individual performance measures of guideline-recommended care**

|                                                     |                    |
|-----------------------------------------------------|--------------------|
| Stroke patient is mobilized on the day of admission |                    |
| Family income tertile                               |                    |
| Low                                                 | 0.75 (0.66 - 0.85) |
| Middle                                              | 0.87 (0.80 - 0.94) |
| High                                                | Reference          |
| Employment status                                   |                    |
| Working                                             | Reference          |
| Retired                                             | 0.90 (0.82 - 0.99) |
| Unemployed                                          | 0.84 (0.69 - 1.02) |
| Highest achieved education                          |                    |
| Primary                                             | 1.03 (0.90 - 1.18) |
| Upper secondary                                     | 1.08 (0.98 - 1.20) |
| Higher                                              | Reference          |
| Reference person                                    | 0.29 (0.20 - 0.42) |
| R <sup>2</sup>                                      | 0.156              |
| n                                                   | 30,307             |

\* Odds ratios (95% confidence interval) of individual performance measure fulfilment. Adjusted for gender, age, previous stroke, diabetes mellitus, hypertension, stroke severity and year. Multilevel modelling was used as the patient-level was nested in the hospital department-level.

**Table S7. Association between socioeconomic status and individual performance measures of guideline-recommended care**

|                                                                                          |                    |
|------------------------------------------------------------------------------------------|--------------------|
| Stroke patient receives a nutritional risk assessment within the second day of admission |                    |
| Family income tertile                                                                    |                    |
| Low                                                                                      | 0.78 (0.73 - 0.84) |
| Middle                                                                                   | 0.88 (0.83 - 0.93) |
| High                                                                                     | Reference          |
| Employment status                                                                        |                    |
| Working                                                                                  | Reference          |
| Retired                                                                                  | 0.88 (0.80 - 0.97) |
| Unemployed                                                                               | 0.92 (0.81 - 1.05) |
| Highest achieved education                                                               |                    |
| Primary                                                                                  | 1.00 (0.91 - 1.11) |
| Upper secondary                                                                          | 1.04 (0.97 - 1.12) |
| Higher                                                                                   | Reference          |
| Reference person                                                                         | 0.92 (0.67 - 1.26) |
| R <sup>2</sup>                                                                           | 0.070              |
| n                                                                                        | 62,372             |

\* Odds ratios (95% confidence interval) of individual performance measure fulfilment. Adjusted for gender, age, previous stroke, diabetes mellitus, hypertension, stroke severity and year. Multilevel modelling was used as the patient-level was nested in the hospital department-level.

**Table S8. Association between socioeconomic status and individual performance measures of guideline-recommended care**

|                                                                                |                    |
|--------------------------------------------------------------------------------|--------------------|
| Stroke patient is admitted to a stroke unit within the second day of admission |                    |
| Family income tertile                                                          |                    |
| Low                                                                            | 0.76 (0.68 - 0.85) |
| Middle                                                                         | 0.83 (0.76 - 0.91) |
| High                                                                           | Reference          |
| Employment status                                                              |                    |
| Working                                                                        | Reference          |
| Retired                                                                        | 1.00 (0.91 - 1.09) |
| Unemployed                                                                     | 1.08 (0.89 - 1.31) |
| Highest achieved education                                                     |                    |
| Primary                                                                        | 0.97 (0.85 - 1.11) |
| Upper secondary                                                                | 1.07 (0.97 - 1.17) |
| Higher                                                                         | Reference          |
| Reference person                                                               | 2.64 (1.55 - 4.51) |
| R <sup>2</sup>                                                                 | 0.046              |
| n                                                                              | 65,035             |

\* Odds ratios (95% confidence interval) of individual performance measure fulfilment. Adjusted for gender, age, previous stroke, diabetes mellitus, hypertension, stroke severity and year. Multilevel modelling was used as the patient-level was nested in the hospital department-level.

**Table S9. Association between socioeconomic status and individual performance measures of guideline-recommended care**

|                                                                            |  |
|----------------------------------------------------------------------------|--|
| Ischemic stroke patient is examined with ultrasound/ CT-/MR-angiography of |  |
|----------------------------------------------------------------------------|--|

|                                             |                    |
|---------------------------------------------|--------------------|
| carotid arteries within 4 days of admission |                    |
| Family income tertile                       |                    |
| Low                                         | 0.79 (0.70 - 0.88) |
| Middle                                      | 0.88 (0.81 - 0.96) |
| High                                        | Reference          |
| Employment status                           |                    |
| Working                                     | Reference          |
| Retired                                     | 0.82 (0.74 - 0.91) |
| Unemployed                                  | 0.97 (0.82 - 1.16) |
| Highest achieved education                  |                    |
| Primary                                     | 0.81 (0.72 - 0.90) |
| Upper secondary                             | 0.91 (0.83 - 1.00) |
| Higher                                      | Reference          |
| Reference person                            | 0.56 (0.31 - 1.00) |
| R <sup>2</sup>                              | 0.152              |
| n                                           | 36,822             |

\* Odds ratios (95% confidence interval) of individual performance measure fulfilment. Adjusted for gender, age, previous stroke, diabetes mellitus, hypertension, stroke severity and year. Multilevel modelling was used as the patient-level was nested in the hospital department-level.

**Table S10. Association between socioeconomic status and individual performance measures of guideline-recommended care**

|                                                                             |                    |
|-----------------------------------------------------------------------------|--------------------|
| Stroke patient is admitted to a hospital within 3 hours after symptom onset |                    |
| Family income tertile                                                       |                    |
| Low                                                                         | 0.67 (0.63 - 0.73) |
| Middle                                                                      | 0.82 (0.77 - 0.88) |
| High                                                                        | Reference          |
| Employment status                                                           |                    |
| Working                                                                     | Reference          |
| Retired                                                                     | 0.82 (0.76 - 0.89) |
| Unemployed                                                                  | 1.05 (0.94 - 1.18) |
| Highest achieved education                                                  |                    |
| Primary                                                                     | 0.94 (0.86 - 1.03) |
| Upper secondary                                                             | 0.97 (0.90 - 1.05) |
| Higher                                                                      | Reference          |
| Reference person                                                            | 2.37 (1.72 - 3.27) |
| R <sup>2</sup>                                                              | 0.052              |
| n                                                                           | 28,379             |

\* Odds ratios (95% confidence interval) of individual performance measure fulfilment. Adjusted for gender, age, previous stroke, diabetes mellitus, hypertension, stroke severity and year. Multilevel modelling was used as the patient-level was nested in the hospital department-level.

**Table S11. Association between socioeconomic status and individual performance measures of guideline-recommended care**

|                                                                            |  |
|----------------------------------------------------------------------------|--|
| Stroke patient is admitted to a hospital within 4.5 hours of symptom onset |  |
| Family income tertile                                                      |  |

|                            |                    |
|----------------------------|--------------------|
| Low                        | 0.68 (0.63 - 0.74) |
| Middle                     | 0.81 (0.76 - 0.87) |
| High                       | Reference          |
| Employment status          |                    |
| Working                    | Reference          |
| Retired                    | 0.83 (0.77 - 0.91) |
| Unemployed                 | 1.05 (0.94 - 1.18) |
| Highest achieved education |                    |
| Primary                    | 0.98 (0.89 - 1.06) |
| Upper secondary            | 0.98 (0.91 - 1.05) |
| Higher                     | Reference          |
| Reference person           | 3.72 (2.76 - 5.00) |
| R <sup>2</sup>             | 0.050              |
| n                          | 28,379             |

\* Odds ratios (95% confidence interval) of individual performance measure fulfilment. Adjusted for gender, age, previous stroke, diabetes mellitus, hypertension, stroke severity and year. Multilevel modelling was used as the patient-level was nested in the hospital department-level.

**Table S12. Association between socioeconomic status and individual performance measures of guideline-recommended care**

|                                                                                                                                                               |                    |
|---------------------------------------------------------------------------------------------------------------------------------------------------------------|--------------------|
| Stroke patient receives indirect swallowing test on the day of admission before receiving food or fluids to assess swallowing function and risk of aspiration |                    |
| Family income tertile                                                                                                                                         |                    |
| Low                                                                                                                                                           | 0.85 (0.76 - 0.96) |
| Middle                                                                                                                                                        | 0.92 (0.83 - 1.02) |
| High                                                                                                                                                          | Reference          |
| Employment status                                                                                                                                             |                    |
| Working                                                                                                                                                       | Reference          |
| Retired                                                                                                                                                       | 0.89 (0.77 - 1.02) |
| Unemployed                                                                                                                                                    | 0.87 (0.65 - 1.16) |
| Highest achieved education                                                                                                                                    |                    |
| Primary                                                                                                                                                       | 0.88 (0.77 - 0.99) |
| Upper secondary                                                                                                                                               | 0.99 (0.87 - 1.13) |
| Higher                                                                                                                                                        | Reference          |
| Reference person                                                                                                                                              | 4.45 (3.10 - 6.40) |
| R <sup>2</sup>                                                                                                                                                | 0.010              |
| n                                                                                                                                                             | 24,360             |

\* Odds ratios (95% confidence interval) of individual performance measure fulfilment. Adjusted for gender, age, previous stroke, diabetes mellitus, hypertension, stroke severity and year. Multilevel modelling was used as the patient-level was nested in the hospital department-level.

**Table S13. Association between socioeconomic status and individual performance measures of guideline-recommended care**

|                                                                                                                                                             |  |
|-------------------------------------------------------------------------------------------------------------------------------------------------------------|--|
| Stroke patient receives direct swallowing test on the day of admission before receiving food or fluids to assess swallowing function and risk of aspiration |  |
|-------------------------------------------------------------------------------------------------------------------------------------------------------------|--|

|                            |                    |
|----------------------------|--------------------|
| Family income tertile      |                    |
| Low                        | 0.86 (0.77 - 0.96) |
| Middle                     | 0.92 (0.85 - 1.01) |
| High                       | Reference          |
| Employment status          |                    |
| Working                    | Reference          |
| Retired                    | 0.86 (0.74 - 1.01) |
| Unemployed                 | 0.89 (0.67 - 1.18) |
| Highest achieved education |                    |
| Primary                    | 0.89 (0.78 - 1.02) |
| Upper secondary            | 1.00 (0.87 - 1.15) |
| Higher                     | Reference          |
| Reference person           | 2.31 (1.55 - 3.43) |
| R <sup>2</sup>             | 0.015              |
| n                          | 21,454             |

\* Odds ratios (95% confidence interval) of individual performance measure fulfilment. Adjusted for gender, age, previous stroke, diabetes mellitus, hypertension, stroke severity and year. Multilevel modelling was used as the patient-level was nested in the hospital department-level.

**Table S14. Association between socioeconomic status and individual performance measures of guideline-recommended care**

|                                                                                      |                    |
|--------------------------------------------------------------------------------------|--------------------|
| Ischemic stroke patient undergoes carotid endarterectomy within 14 days of admission |                    |
| Family income tertile                                                                |                    |
| Low                                                                                  | 0.82 (0.48 - 1.40) |
| Middle                                                                               | 0.89 (0.57 - 1.38) |
| High                                                                                 | Reference          |
| Employment status                                                                    |                    |
| Working                                                                              | Reference          |
| Retired                                                                              | 0.57 (0.34 - 0.97) |
| Unemployed                                                                           | 1.08 (0.26 - 4.50) |
| Highest achieved education                                                           |                    |
| Primary                                                                              | 1.32 (0.71 - 2.44) |
| Upper secondary                                                                      | 1.25 (0.79 - 1.98) |
| Higher                                                                               | Reference          |
| Reference person                                                                     | 0.44 (0.07 - 2.71) |
| R <sup>2</sup>                                                                       | 0.075              |
| n                                                                                    | 656                |

\* Odds ratios (95% confidence interval) of individual performance measure fulfilment. Adjusted for gender, age, previous stroke, diabetes mellitus, hypertension, stroke severity and year. Multilevel modelling was used as the patient-level was nested in the hospital department-level.

**Table S15. Association between socioeconomic status and individual performance measures of guideline-recommended care**

|                                                                                         |  |
|-----------------------------------------------------------------------------------------|--|
| Stroke patient is treated with thrombolysis and has a door to needle time within 1 hour |  |
| Family income tertile                                                                   |  |

|                            |                    |
|----------------------------|--------------------|
| Low                        | 1.17 (0.75 - 1.83) |
| Middle                     | 0.93 (0.74 - 1.17) |
| High                       | Reference          |
| Employment status          |                    |
| Working                    | Reference          |
| Retired                    | 0.78 (0.63 - 0.96) |
| Unemployed                 | 0.87 (0.52 - 1.48) |
| Highest achieved education |                    |
| Primary                    | 0.90 (0.73 - 1.10) |
| Upper secondary            | 1.04 (0.87 - 1.24) |
| Higher                     | Reference          |
| Reference person           | 1.15 (0.53 - 2.48) |
| R <sup>2</sup>             | 0.062              |
| n                          | 3,299              |

\* Odds ratios (95% confidence interval) of individual performance measure fulfilment. Adjusted for gender, age, previous stroke, diabetes mellitus, hypertension, stroke severity and year. Multilevel modelling was used as the patient-level was nested in the hospital department-level.

**Table S16. Association between socioeconomic status and individual performance measures of guideline-recommended care**

|                                               |                    |
|-----------------------------------------------|--------------------|
| Ischemic stroke patient receives thrombolysis |                    |
| Family income tertile                         |                    |
| Low                                           | 0.47 (0.42 - 0.53) |
| Middle                                        | 0.67 (0.59 - 0.75) |
| High                                          | Reference          |
| Employment status                             |                    |
| Working                                       | Reference          |
| Retired                                       | 0.76 (0.68 - 0.84) |
| Unemployed                                    | 1.07 (0.91 - 1.26) |
| Highest achieved education                    |                    |
| Primary                                       | 0.94 (0.79 - 1.12) |
| Upper secondary                               | 0.95 (0.81 - 1.12) |
| Higher                                        | Reference          |
| Reference person                              | 0.34 (0.17 - 0.68) |
| R <sup>2</sup>                                | 0.084              |
| n                                             | 25,123             |

\* Odds ratios (95% confidence interval) of individual performance measure fulfilment. Adjusted for gender, age, previous stroke, diabetes mellitus, hypertension, stroke severity and year. Multilevel modelling was used as the patient-level was nested in the hospital department-level.

**Figure S1 Average crude performance over time**



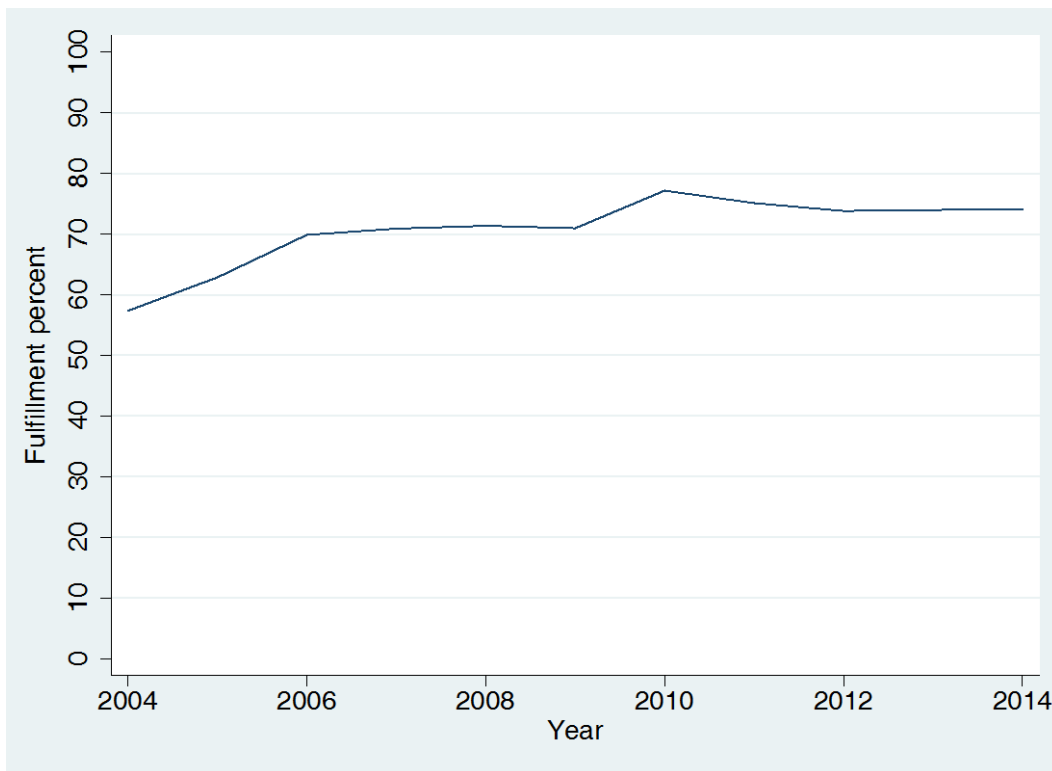

**Figure S2 Income distribution over time**

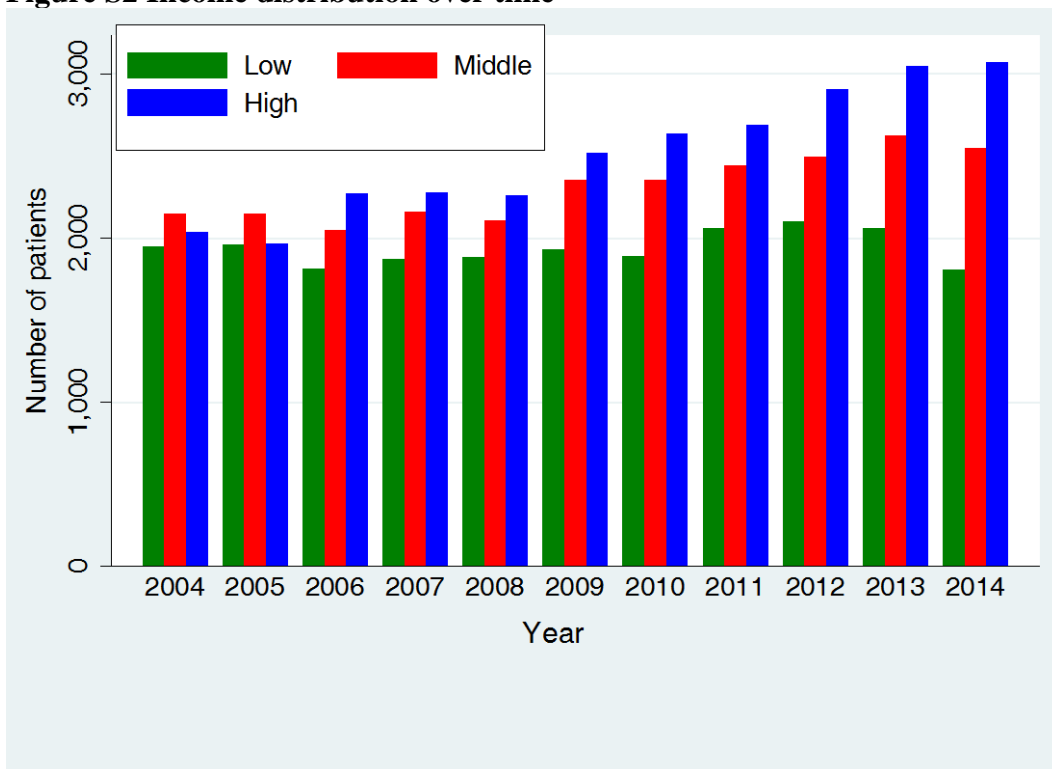

**Figure S3 Employment distribution over time**

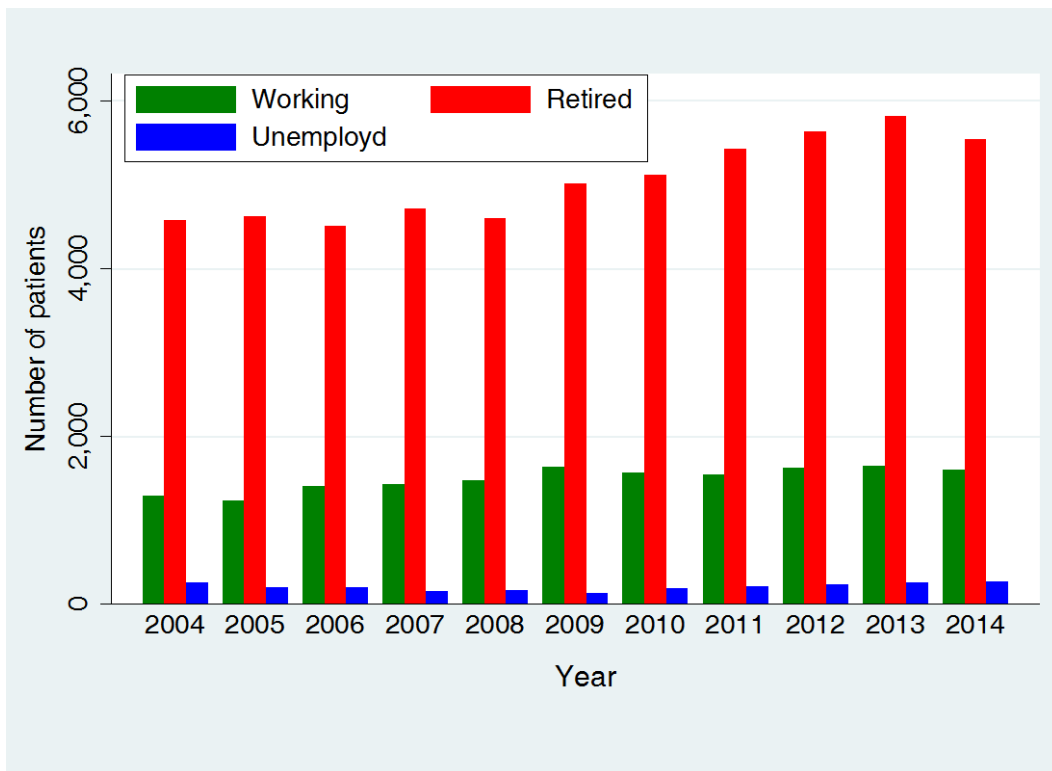

**Figure S4 Education distribution over time**

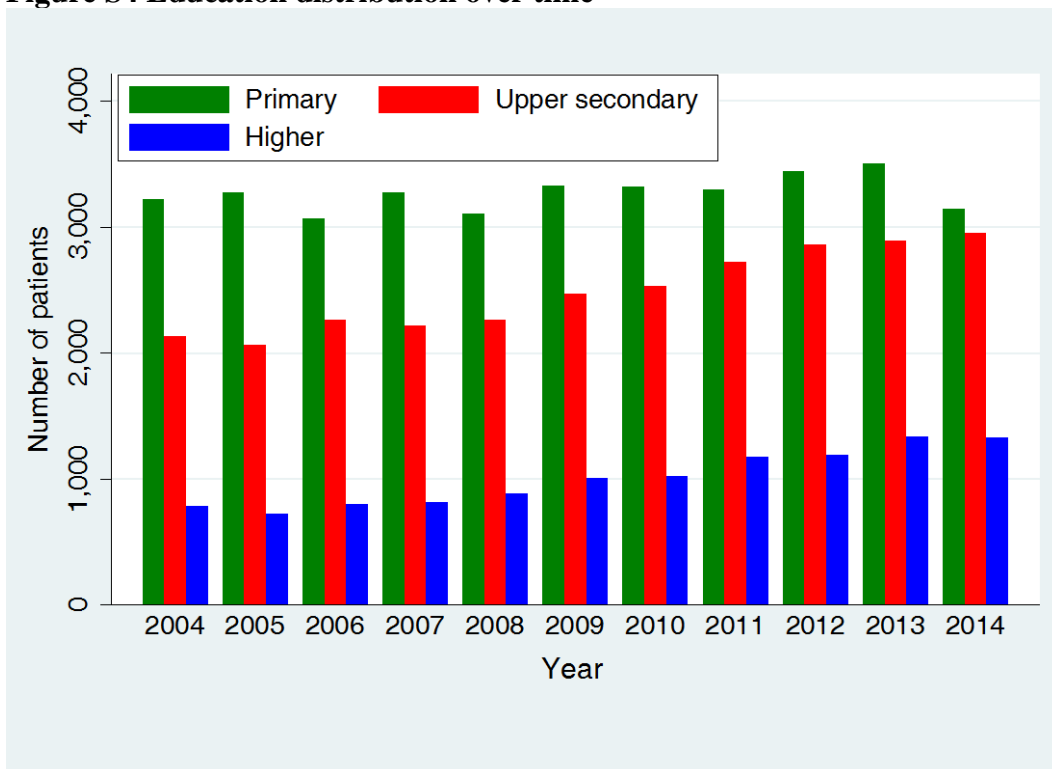

Supplement: Supplementary file 1 [file get_supplementary_file.php]
